# Supplementary material for: Cooperation between MEF2 and PPARγ in human intestinal β,β-carotene 15,15'-monooxygenase gene expression
Source: PubMed Central journal article supplement (PMC1526748; doi:10.1186/1471-2199-7-7), 2006-02-21

**A**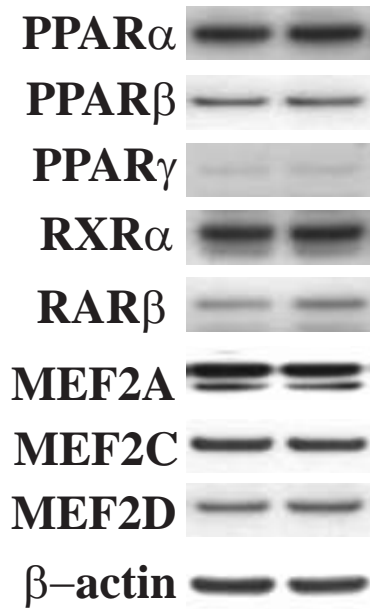**B**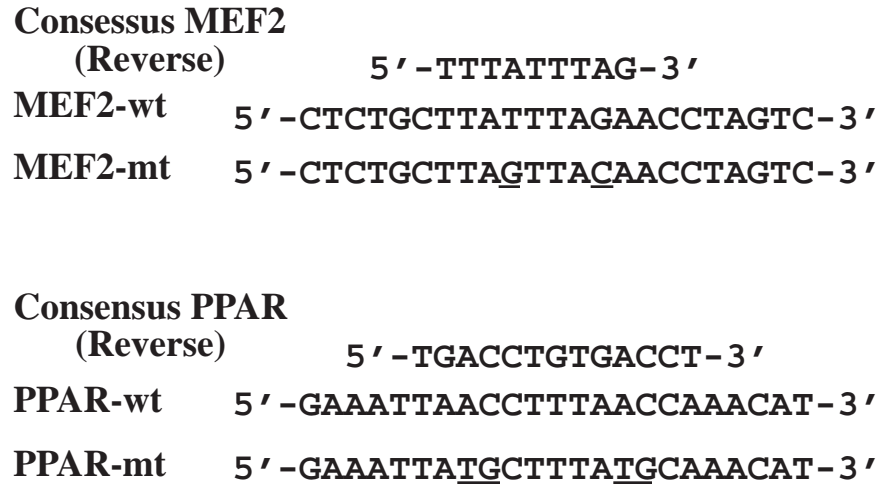**C**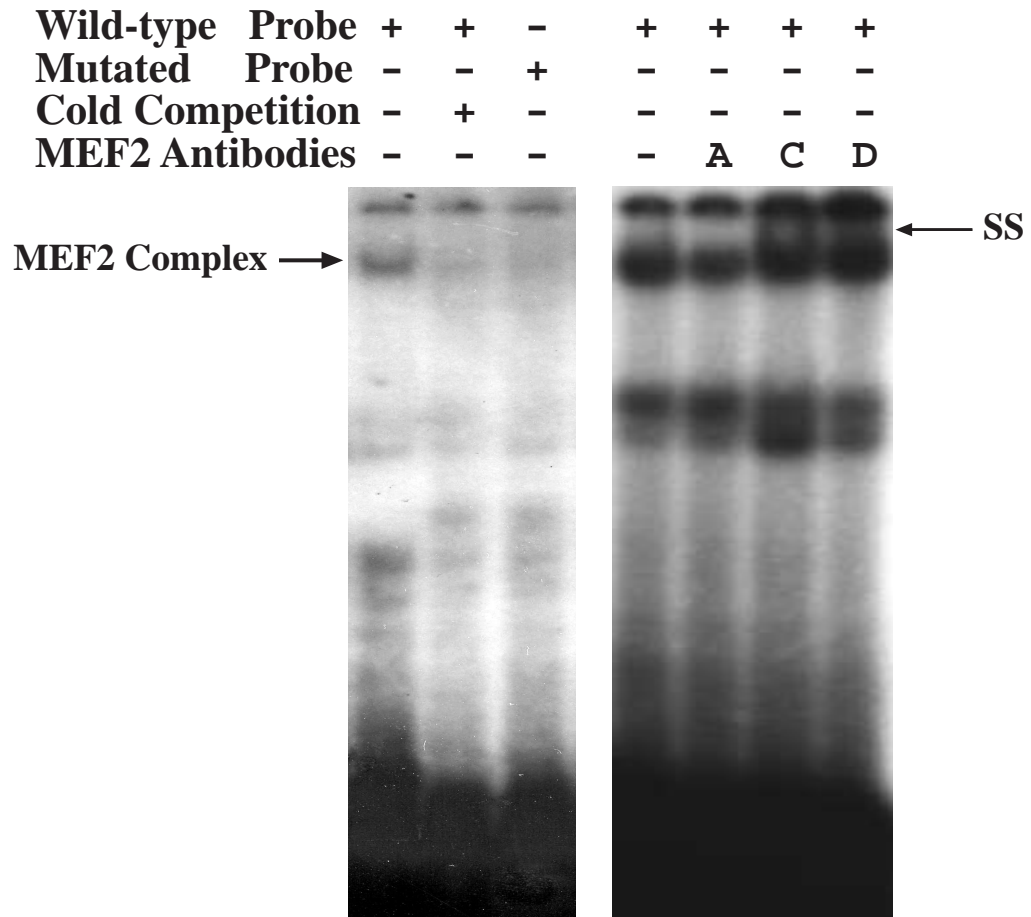

# D

|                         |   |   |   |   |          |          |          |          |         |
|-------------------------|---|---|---|---|----------|----------|----------|----------|---------|
| <b>Wild-type Probe</b>  | + | + | - | + | +        | +        | +        | +        | +       |
| <b>Mutated Probe</b>    | - | - | + | - | -        | -        | -        | -        | -       |
| <b>Cold Competition</b> | - | + | - | - | -        | -        | -        | -        | -       |
| <b>PPAR Antibodies</b>  | - | - | - | - | $\alpha$ | $\gamma$ | $\delta$ | -        | -       |
| <b>RXR Antibody</b>     | - | - | - | - | -        | -        | -        | $\alpha$ | -       |
| <b>RAR Antibody</b>     | - | - | - | - | -        | -        | -        | -        | $\beta$ |

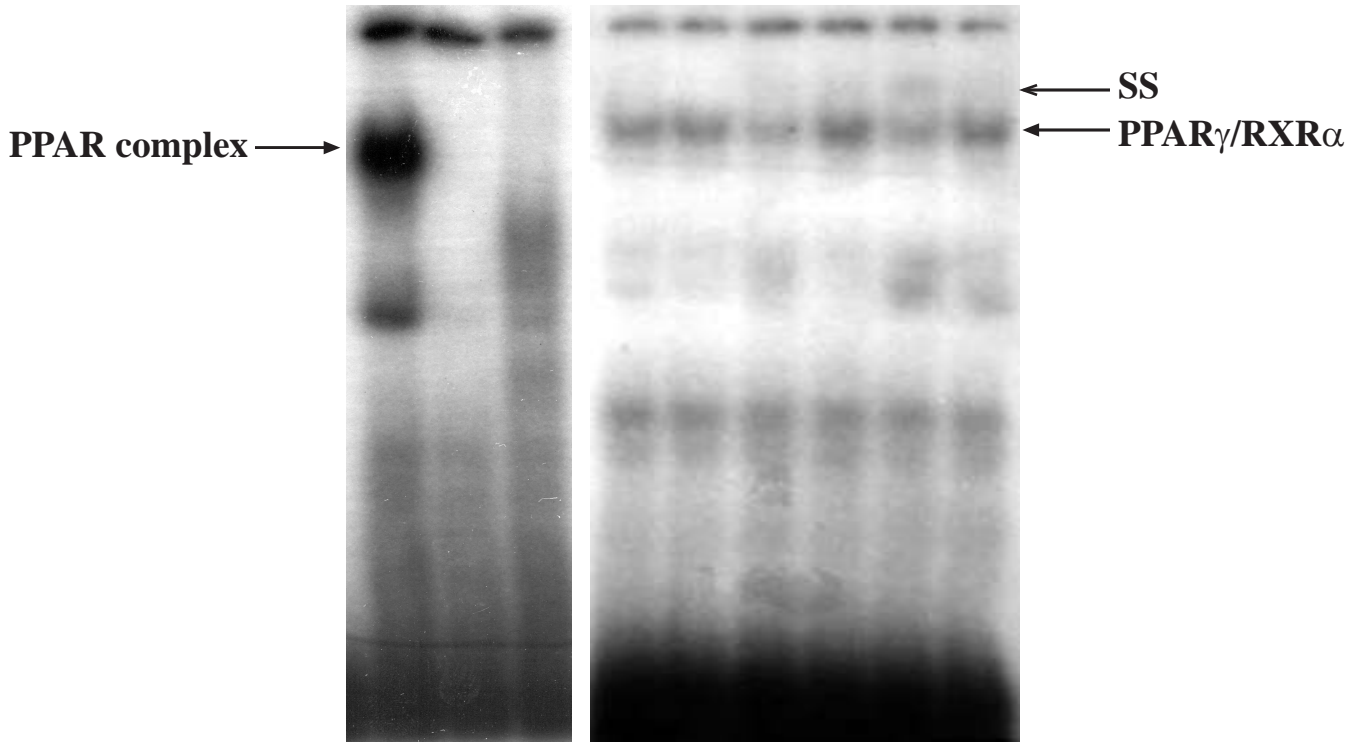

Supplement: 1471-2199-7-7-S2.pdf [file 1471-2199-7-7-S2.pdf]
