# Supplementary material for: Cooperation between MEF2 and PPARγ in human intestinal β,β-carotene 15,15'-monooxygenase gene expression
Source: PubMed Central journal article supplement (PMC1526748; doi:10.1186/1471-2199-7-7), 2006-02-21

**A**

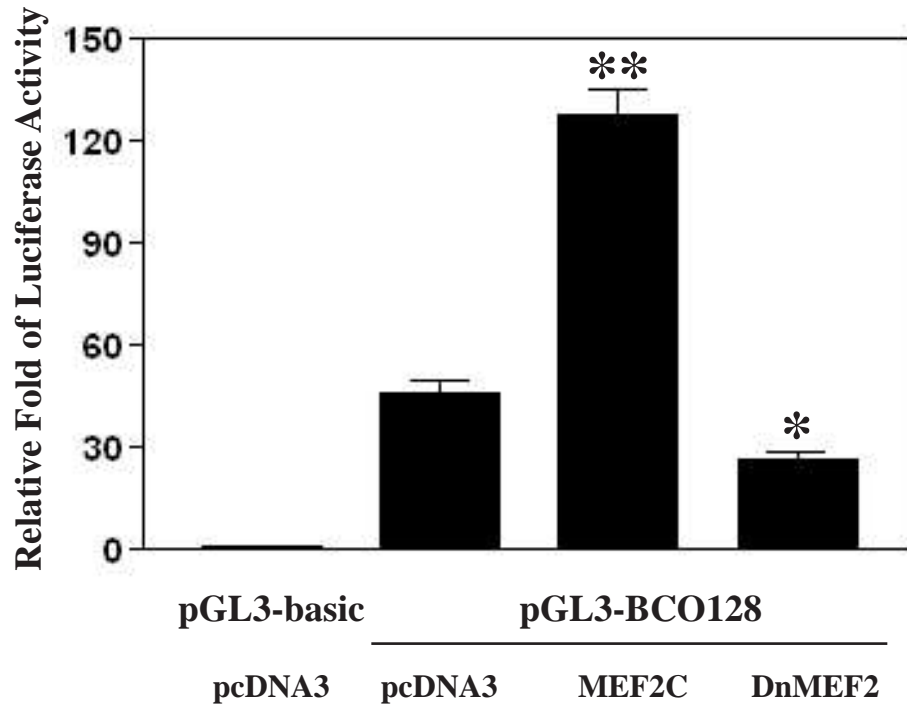

**B**

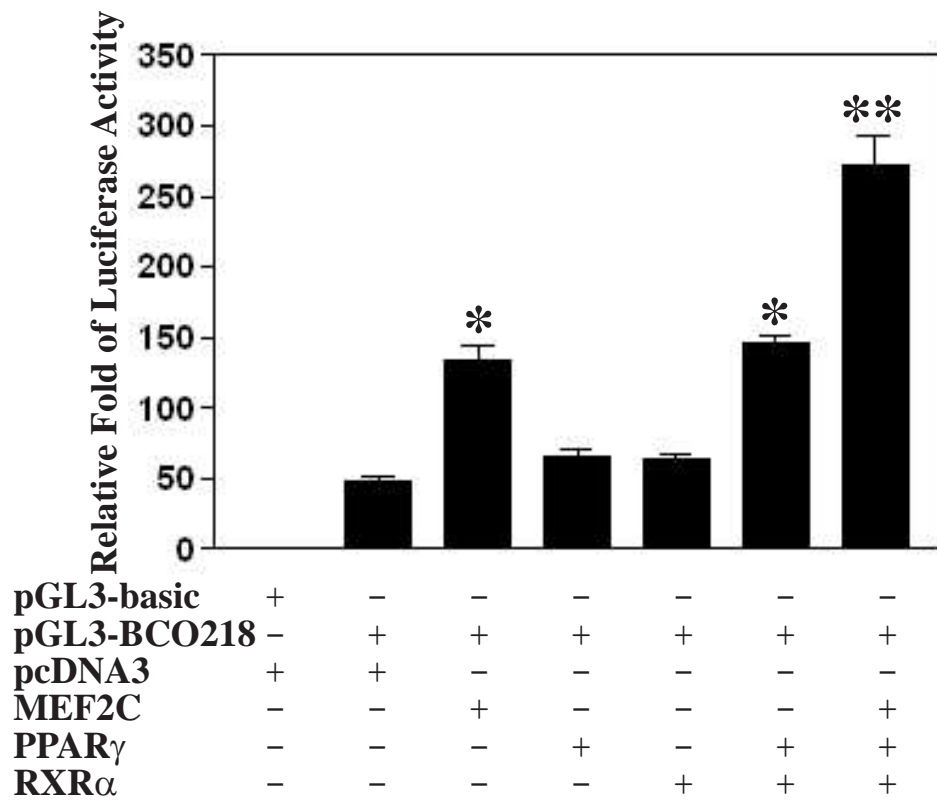

C

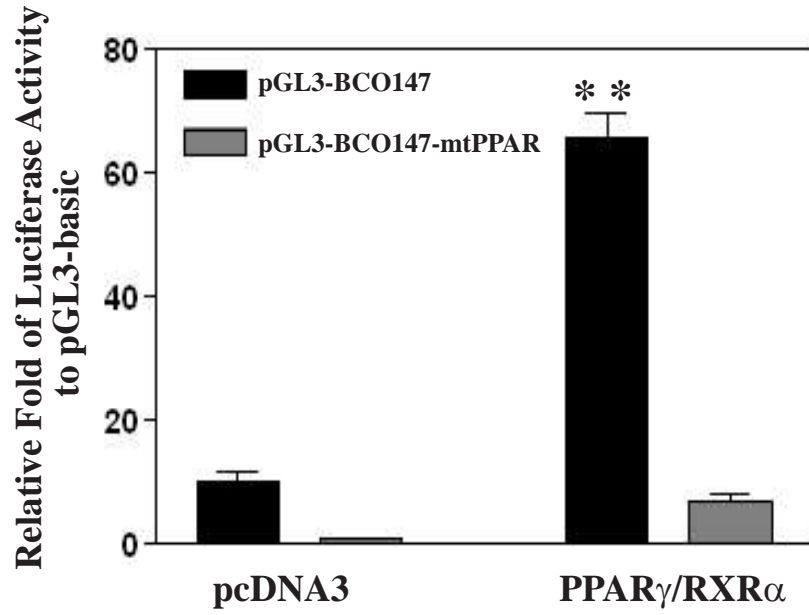

D

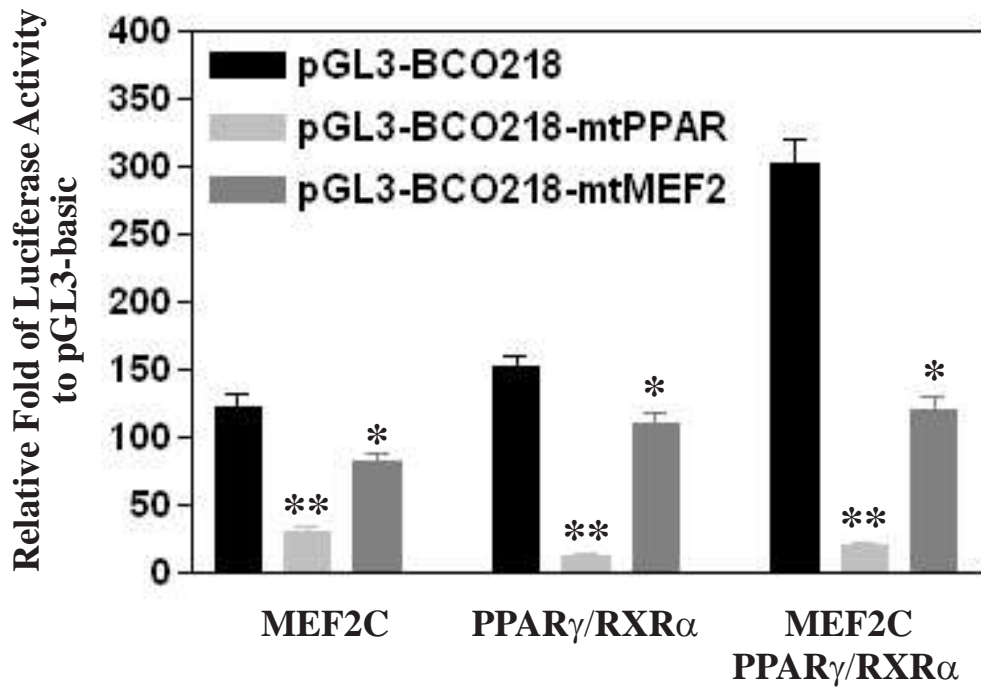

Supplement: 1471-2199-7-7-S3.pdf [file 1471-2199-7-7-S3.pdf]
