# Supplementary material for: Cooperation between MEF2 and PPARγ in human intestinal β,β-carotene 15,15'-monooxygenase gene expression
Source: BMC Mol Biol. 2006 Feb 21;7:7. doi: 10.1186/1471-2199-7-7 (PMC1526748; doi:10.1186/1471-2199-7-7)
Supplement: Additional file 1 — A. Nucleotide sequence of the human β, β-carotene 15,15’-monooxygenase 1 (BCMO1) promoter. Nucleotides are numbered relative to the transcriptional start site (+1) [34]. Potential consensus sequences for transcription factor binding sites are underlined and labeled. The sequence was analyzed according to the TESS program and TRACSFAC transcription factor database. B. Alignment of ~900-bp of human and mouse proximal BCMO1 genomic sequence by the ClustalW (1.82) program [55]. The numbering is relative to the transcription initiation site (+1). The sequences in bold and labeled indicate putative DNA regulatory elements common to the two promoters. [file 1471-2199-7-7-S1.pdf]

A

|      |                    |                   |                   |                    |                    |                     |
|------|--------------------|-------------------|-------------------|--------------------|--------------------|---------------------|
| -995 |                    |                   |                   | CAAGTTGAAT         | ACGAATTTCA         | GGCAATGGCA          |
| -965 | ACACACGAAG         | ATACACGAAT        | AATAGGGAAG        | CTCAGATCAA         | ATTCAGGCAT         | TGTTTTGCCC          |
| -905 | TCTTGATAGG         | CCAGGAAGTT        | GAAGTTTCTT        | TTTAACTATT         | CTGTTTACTT         | ATTTATTTTT          |
| -845 | TGAGACAGAG         | TCTCACTCTG        | TGGCCGAGGC        | TGGAGTGCAG         | TGGTGCCATC         | TCAGCTTACT          |
| -785 | GCAATGTCTG         | CCTCACAGGT        | TCAAGCGATT        | TTCCTGCCTC         | AGCCTCCTTA         | GCATCTGGGA          |
| -725 | TTGCAGGCGT         | CTTCCACCAC        | GCCTGGATAA        | TTTTTGTATT         | TTTAGTAGAG         | ACAGGATTTT          |
| -665 | GCCGTGTTGG         | CCAGGCTGGT        | CTCGAACTCC        | <u>TGACCT</u> CAAG | <u>TGACCC</u> GCCA | ACCATGGCCT          |
|      |                    |                   |                   | RAR CRE            |                    |                     |
| -605 | CCCAAAGTTC         | TGGGATTACA        | GGCATGAGCC        | ACCACTCCTG         | GCCCGTCTTT         | TTTACTATTC          |
| -545 | TTTATAGTTT         | CTGAGAAAAG        | CCTTTGGTTC        | CCGTTCGTTA         | TTTTTTTAAAT        | AGGTACATGA          |
| -485 | AACATTTTAT         | GTCTCCTTCT        | TCCAAAAAGA        | AAATAATGAA         | TTAAGTGGCT         | CTTTATGTAT          |
| -425 | GATTATTAGA         | GGGGAGCATC        | GGGGCCTTTA        | CTAAAAACAA         | AACAAAATGT         | AAAACCTTTT          |
| -365 | CCGTCTCTGC         | TGAAGGGGTT        | CCCTGCTGTG        | CAGCAGACAT         | TCAGTGATCA         | CAGAGCTTAG          |
| -305 | CTCAAGTTTC         | TCCTAATTCC        | CAGCACCTCT        | GATTCCCAGC         | ATCTCTTCTT         | GTTCTGATCA          |
| -245 | TAAACAACCTC        | CAGCTCTTGG        | ATTACGTCGG        | GCAACATAAC         | AGCAGGCACG         | GAATTCTCTC          |
| -185 | <u>TGCTTATTTA</u>  | GAACCTAGTC        | <u>TGAAGCAAGC</u> | TTTTTTTTTT         | TTTTTGTTAA         | <u>GTCAAAAAGTG</u>  |
|      | MEF2               |                   | C/EBP             |                    |                    | IRF1                |
| -125 | AAACTGGAGA         | GGGAAAGCTG        | AGGGAACAAT        | AAGAGGATTA         | <u>AAGATTAGCT</u>  | ATGACAC <u>CATG</u> |
|      |                    |                   |                   |                    | GATA-1             |                     |
| -065 | <u>GCTTG</u> GAAAT | <u>TAACCTTTAA</u> | <u>CCAAACATCT</u> | TATAAGTAAC         | GCCAGCGCAG         | CTTCCCTTGT          |
|      | AP2                | PPAR/RXR          |                   |                    |                    |                     |
| -005 | GAATGTAAG          | AGATCCAGGG        | CTCTTGAGAG        | GGGACAAGTG         | AGAGCCAGCC         | AAAAAGGAAA          |
|      | +1                 |                   |                   |                    |                    |                     |
|      | AAGCAAAGGC         | AGAAACGGCA        | TCAGGAGAGA        | CAGAGATGTG         | AAGGAGGGAA         | GGAGCAGGAG          |
|      | AGCAGGAAGG         | AAACGCAGGA        | GGAGGGAGCA        | GCATCTCCTG         | TGAACACAGA         | GGAGCACCTG          |
|      | TTTGCTGTTA         | AAATCGATCT        | CCCTCGGCAC        | CCTGAGCAAT         | G                  |                     |

# B

|       |      |                                                                                         |
|-------|------|-----------------------------------------------------------------------------------------|
| Human | -965 | ACACACGAAGATACAC-GAATAATAGGGAAGCTCAGATCAAATTCAGGCATTGTTTTGCC                            |
| Mouse | -965 | -----CTCTACTGACTGATCCCTGTCTCCAATCCCAAAGCATCTTTAGTTTTATA                                 |
|       |      | * * * * *                                                                               |
| Human | -906 | CTCTTGATAGGCCAGGAAGTTGAAGTTTCTTTTTAACTATTCTGTTTACTTATTTATTTT                            |
| Mouse | -915 | ATTTCTTTAATTACATAAGACAGGGAGATCATACATATTCACGAGGTGTCCTGTGGTGTT                            |
|       |      | * * * * *                                                                               |
| Human | -846 | TTGAGACAGAGTCTCACTCTGTGGCCGAGGCTGGA-GTGCAGTGGTGCCATCTCAGCTTA                            |
| Mouse | -855 | TTGATTC-----CTGTATATGTGGTGGAGTGTGGAAGCCTTCTGCTGCTCTCCTGGCTGA                            |
|       |      | **** * * * * *                                                                          |
| Human | -787 | CTGCAATGTCTGCCTCA-CAGGTTCAAGCGATTTTCTGCCTCAGCCTCCTTAGCATCTG                             |
| Mouse | -800 | GGGCGTCACTTCGAGCAGCAGGAACCGAGAATCCCCCAATTCCCAC--CCTATGCTCTCA                            |
|       |      | * * * * *                                                                               |
| Human | -728 | GGATTGCAG---GCGTCTTCCACCACGCCTGGATAATTTTTGTATTTTTAGTAGA---GA                            |
| Mouse | -742 | AAAATGCAGTGTGGATTTTAGTCTTTGGGTCTCCCTCTTATCAGTCTGAGTTGAACTGA                             |
|       |      | * * * * *                                                                               |
| Human | -674 | CAGGATTTTCGCCGTGTTGGCCAGGCTG--GTCTC--GAACCTCTGACCTCAAGTGACC                             |
| Mouse | -682 | AGGGTTCCCGATGGACTGGCTATGCAGAAGGCCTCAGGGATCCTCTGTCTCTGCCTCCC                             |
|       |      | * * * * *                                                                               |
| Human | -620 | CGCCAACCATGGCCTCCCAAAGTTCTGGG---ATTACAGGCATGAGC---CACCACCTC                             |
| Mouse | -622 | AGCTCTGGAATTCATTCGGGTGCTCTGGGCAGAATTCAAAGCCTCGCTTGTGCACAGGCC                            |
|       |      | * * * * *                                                                               |
| Human | -568 | CTGGC-CCGTCTTTTTTACTATTC--TTTATAGTTTCTGAGAAA---AGCCTTTGG-TT                             |
| Mouse | -562 | CTGACGTTGTTTTGTGTTTTAATTGTTCTTTGGTTCCCGAAAAAGCCAAGTCTTTGTCTT                            |
|       |      | *** * * * * *                                                                           |
| Human | -516 | CCCGTTCGTTATTTTTTAAATAGGTACATGAAACATTTTATGTCTCCTTCTTCCAAAAAG                            |
| Mouse | -502 | CCCCATCTTTGCTTTTTTAAATGGGCACATGACACATCTT-TGAGCCCTCCTTCCAAAAAG                           |
|       |      | *** * * * *                                                                             |
| Human | -456 | AAAATAATGAATTAAGTGGCTCTTTATGTATGATTATTAGAGGGGAGCATCGGGGCCCTTT                           |
| Mouse | -443 | AAAACCA--ATCAAGTGTCCGTTGATAGGATTTTTTTTAAAGAGTGGGAACGA-----                              |
|       |      | **** * * * * *                                                                          |
| Human | -396 | ACTAAAAACAAAACAAAATGTA AACCTTTCCCGTCTCTGCTGAAGGGGTTCCTTGCTGT                            |
| Mouse | -393 | ACCAAGCCCCAGGTTAAATCAAAGCCTTCTCTCTCTGTTTGCAAGGCAAGATGTCA                                |
|       |      | * * * * *                                                                               |
| Human | -336 | GCAGCAGACATTCAGTGATCACAGAGCTTAGCTC---AAGTTTCTCCTAATTCCCAGCAC                            |
| Mouse | -333 | CCAGCCCACAACCTTGCAATAGTGCGGTCAATGTCTTTGATGGTCCCCTCGCTTGAAGAGC                           |
|       |      | **** * * * * *                                                                          |
| Human | -279 | CTCTGAT--TCCCA--GCATCTCTTCTTGTCTGATCATAAACAACCTCCAGCTCT----                             |
| Mouse | -273 | CTTTGCTGATCCCAAATGCTGTTCTCTCTGCTCTAACCATAAATGCATCCAGTTCTCAGG                            |
|       |      | * * * * *                                                                               |
| Human | -228 | -TGGATTACGTCGGGCAA-CATAACAGCAGGCACGGAATTCTCTCTGCTTATTTAGAACC                            |
| Mouse | -213 | ATGGGCTAGCTCGGGCAAATCAGCAGAACGCGCCAAATCATCTCTTCCGACTCAGAGCG                             |
|       |      | *** * * * * *                                                                           |
|       |      | <u>IRF1</u>                                                                             |
| Human | -170 | TAGTCTGAAGCAAGCTTTTTTTTTTTTTTGGTTAAGT <b>CAAAAGT</b> GAAACTGGAGAGGGAA                   |
| Mouse | -153 | GAGCCT-----TCCTTGCTAAGCTAAAAGTGAATCAGAGCGGAGG                                           |
|       |      | * * * *                                                                                 |
|       |      | <u>GATA1</u> <u>bHLH</u> <u>AP2</u>                                                     |
| Human | -110 | AGCTGAGGGAACAATAAGAGGATTAA <b>AAGATTAGCT</b> TATG <b>CACATGGCTTGG</b> AAAT <b>TAACC</b> |
| Mouse | -111 | AGTTGGAAAAACACTAATGGGATTAAAGATTAGCAGTAACACATGGCTTGGGAACTGACC                            |
|       |      | * * * * *                                                                               |
|       |      | <u>PPAR/RXR</u> <u>TATA</u>                                                             |
| Human | -50  | <b>TTTAACCA</b> AACAT-CT <b>TATAA</b> -GTAACGCCAGCGCAGCTTCCCTTGTGAATG -1                |
| Mouse | -51  | TTTGACCTAACACACACACACTGT <b>TATAA</b> ATTACCCAGCAGCTTCCGGCAGC- -1                       |
|       |      | *** * * * *                                                                             |
